# Supplementary material for: Molecular beacon-based NAND logic gate for sensing triplex DNA binders
Source: Royal Society of Chemistry journal article supplement (doi:10.1039/c4ra06158f), 2014-01-01
Supplement: c4ra06158f1.pdf [file c4ra06158f1.pdf]

## Electronic Supplementary Information

### Molecular Beacon-Based NAND Logic Gate for Sensing Triplex DNA Binders

Kai-Cheng Lin,<sup>a</sup> Chia-Yin Kuo,<sup>b</sup> Chih-Chun Nieh<sup>b</sup> and Wei-Lung Tseng<sup>b,c</sup>

<sup>a</sup> Department of Emergency Medicine, Division of Traumatology, Kaohsiung  
Veterans General Hospital, Taiwan

<sup>b</sup> Department of Chemistry, National Sun Yat-sen University, Taiwan

<sup>c</sup> School of Pharmacy, College of Pharmacy, Kaohsiung Medical University, Taiwan

Correspondence: Dr. Wei-Lung Tseng, Department of Chemistry, National Sun Yat-sen University, 70, Lien-hai Road, Kaohsiung, Taiwan 804.

E-mail: [tsengwl@mail.nsysu.edu.tw](mailto:tsengwl@mail.nsysu.edu.tw)

Fax: 011-886-7-3684046.

## Experimental Section

### Chemicals

4-(2-hydroxyethyl)-1-piperazineethanesulfonic acid (HEPES), sodium chloride (NaCl), coralyne sulfoacetate, berberine chloride, palmatine chloride, sanguinarine chloride, 4',6-diamidino-2-phenylindole, ethidium bromide, anthraquinone-2-carboxylic acid, 9-aminoacridine, HgCl<sub>2</sub>, H<sub>3</sub>PO<sub>4</sub>, NaH<sub>2</sub>PO<sub>4</sub>, Na<sub>2</sub>HPO<sub>4</sub>, and Na<sub>3</sub>PO<sub>4</sub> were obtained from Sigma-Aldrich (St. Louis, MO). All DNA samples were synthesized from Neogene Biomedicals Corporation (Taipei, Taiwan). Water used in all experiments was doubly distilled and purified by a Milli-Q system (Millipore, Milford, MA, USA).

### Instrumentation.

The absorption and fluorescence spectra of DNA samples were collected using a double-beam UV-vis spectrophotometer (V670; JASCO, Tokyo, Japan) and a fluorometer (F-7000; Hitachi, Tokyo, Japan), respectively.

### Screening of Triplex DNA Binders

**Table S1** displays the DNA sequences used in our experiments. For detecting triplex DNA binders, all samples were prepared in a solution containing 10 mM HEPES (pH 6–10) and 0–400 mM NaCl. The MB (100 nM, 50  $\mu$ L) probes were incubated with a mixture of polyadenosine (A<sub>6</sub>–A<sub>11</sub>; 0.01–10  $\mu$ M, 50  $\mu$ L) and triplex DNA binder (10  $\mu$ M, 50  $\mu$ L) at ambient temperature for 10 min. The volume of the resulting solutions was adjusted to 500  $\mu$ L with 10 mM HEPES and 300 mM NaCl. We transferred the diluted solutions into a 1 mL quartz cuvette and recorded their fluorescence spectra by

operating the fluorescence spectrophotometer at an excitation wavelength of 480 nm. In the presence of 1  $\mu\text{M}$  coralyne, the melting point of the MB-A<sub>7</sub>-coralyne complex was measured by varying the temperature from 25 to 70 °C.

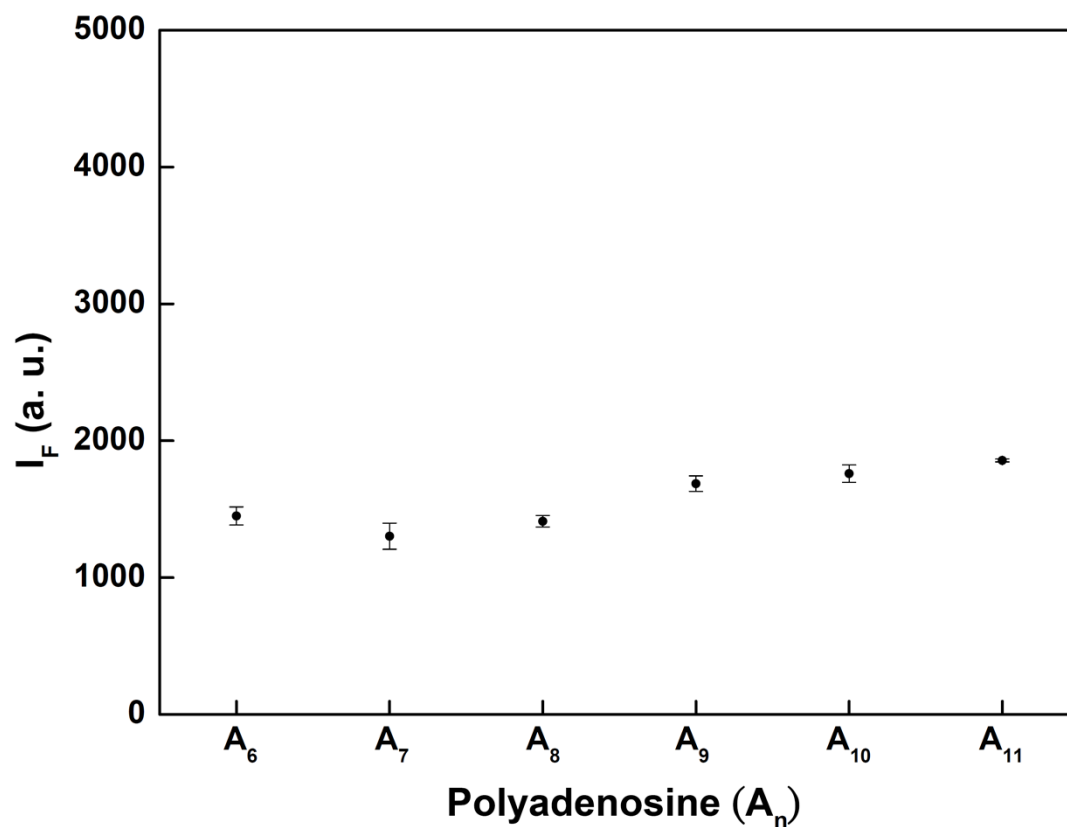

**Fig. S1.** Effect of the polyadenosine length on the fluorescence intensity at 520 nm of the  $T_8$ -MB- $T_8$ · $A_n$ -coralyne complexes. A mixture of 10 nM  $T_8$ -MB- $T_8$  and 100 nM  $A_n$  was incubated with 1  $\mu$ M coralyne in a solution containing 10 mM HEPES (pH 7.0) and 300 mM NaCl at room temperature for 10 min. The error bars represent standard deviations based on three independent measurements.

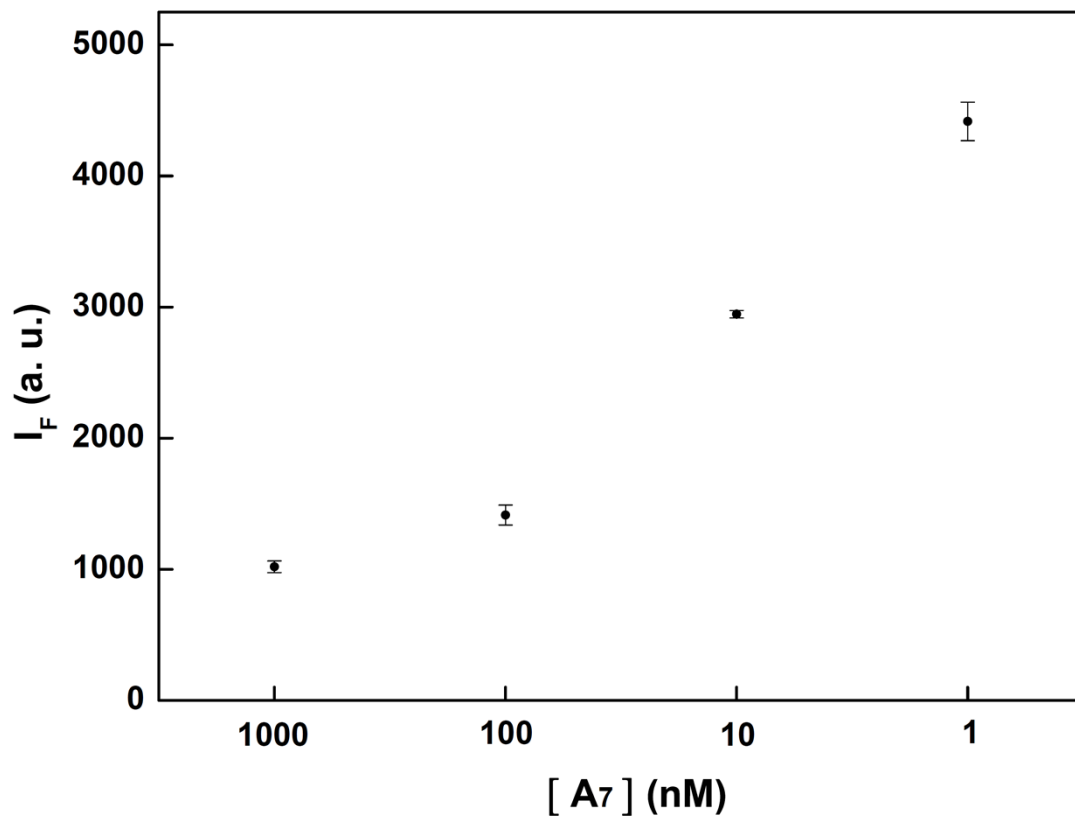

**Fig. S2.** Effect of the concentration of A<sub>7</sub> on the fluorescence intensity at 520 nm of the T<sub>8</sub>-MB-T<sub>8</sub>-A<sub>n</sub>-coralyne complexes. A mixture of 10 nM T<sub>8</sub>-MB-T<sub>8</sub> and 1–1000 nM A<sub>7</sub> was incubated with 1 μM coralyne in a solution containing 10 mM HEPES (pH 7.0) and 300 mM NaCl at room temperature for 10 min. The error bars represent standard deviations based on three independent measurements.

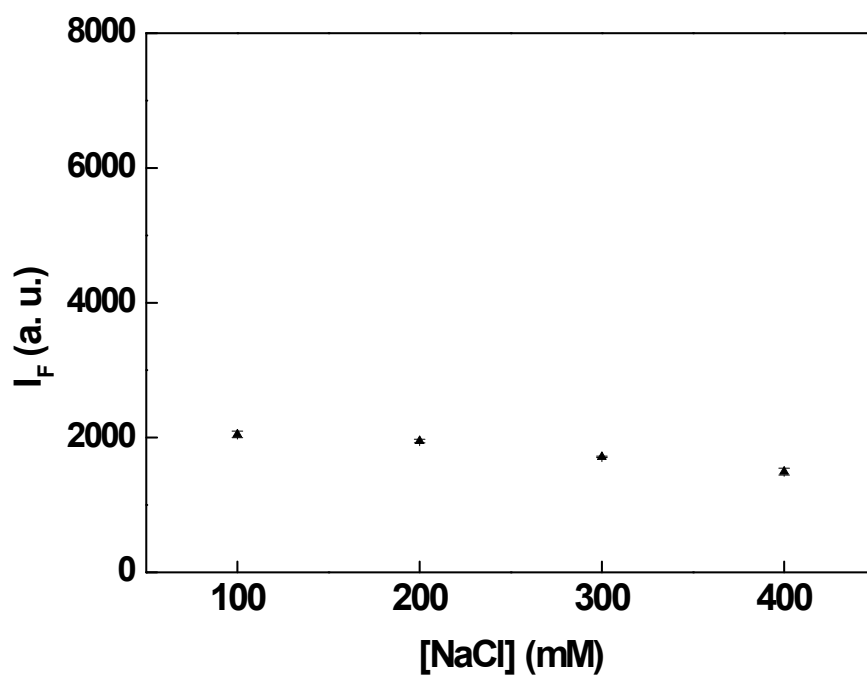

**Fig. S3.** Effect of the salt concentration on the fluorescence intensity at 520 nm of the  $T_8\text{-MB-}T_8\cdot A_n$ -coralyne complexes. A mixture of 10 nM  $T_8\text{-MB-}T_8$  and 100 nM  $A_7$  was incubated with 1  $\mu\text{M}$  coralyne in a solution containing 10 mM HEPES at pH 7.0 and 100–400 mM NaCl at room temperature for 10 min. The error bars represent standard deviations based on three independent measurements.

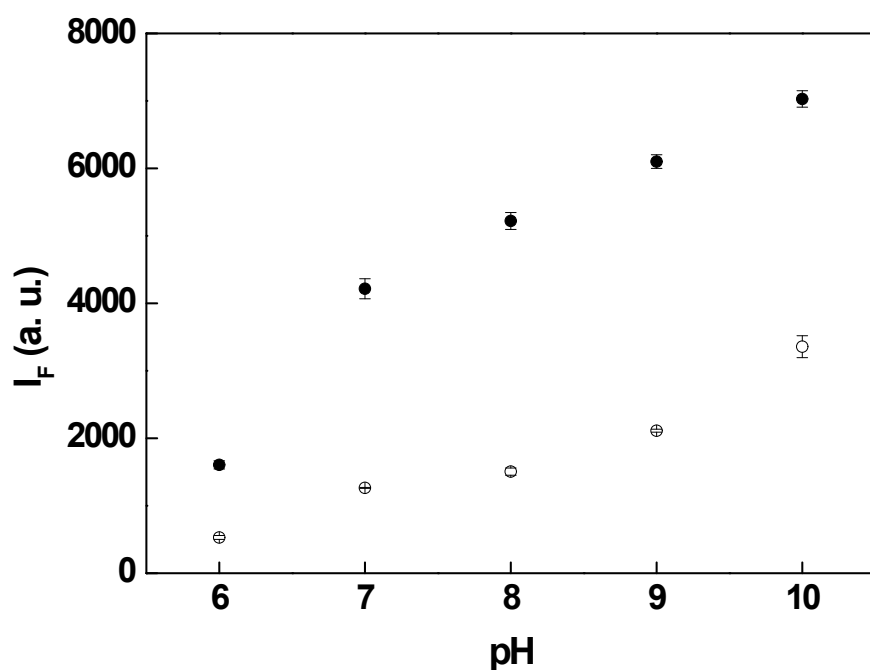

**Fig. S4.** Effect of the solution pH on the fluorescence intensity at 520 nm of the  $T_8$ -MB- $T_8$ · $A_n$ -coralyne complexes. Open circle: the  $T_8$ -MB- $T_8$ · $A_7$ -coralyne complexes; close circle: the  $T_8$ -MB- $T_8$ · $A_7$  probe. A mixture of 10 nM  $T_8$ -MB- $T_8$  and 100 nM  $A_7$  was incubated with 1  $\mu$ M coralyne in a solution containing 10 mM HEPES at pH 6.0–7.0 and 300 mM NaCl at room temperature for 10 min. The error bars represent standard deviations based on three independent measurements.

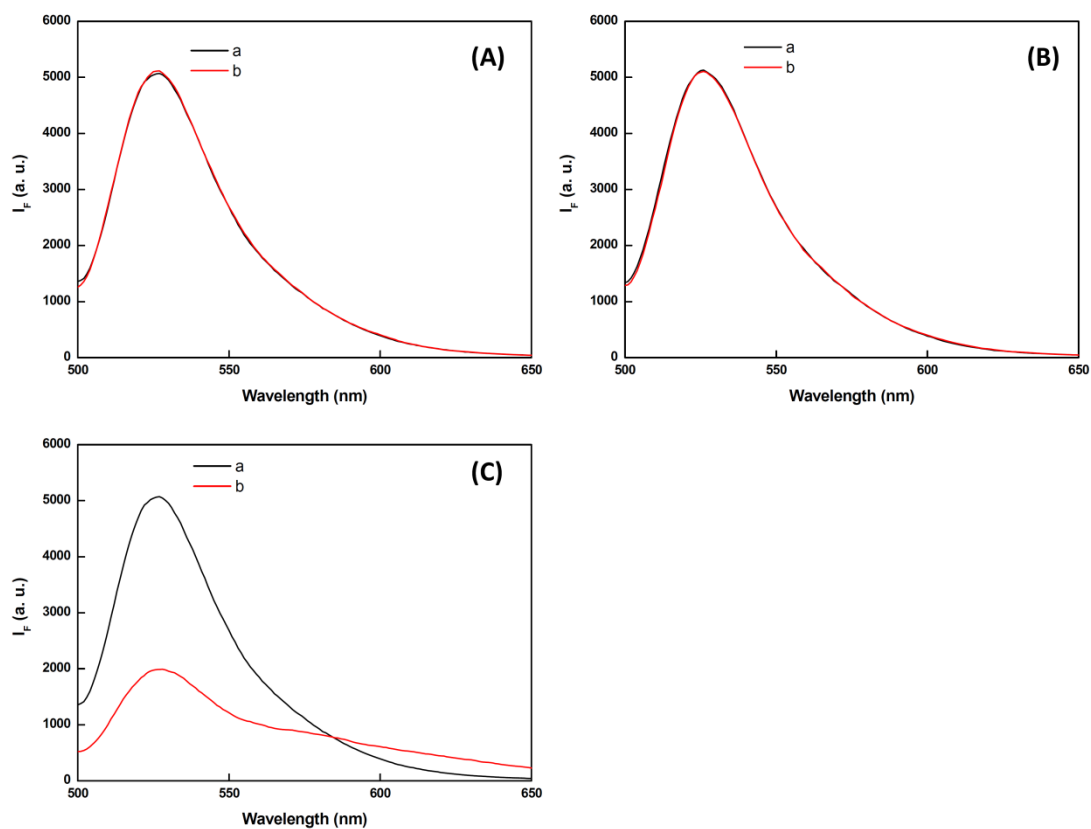

**Fig. S5.** Fluorescence spectra of solutions of the  $T_8$ -MB- $T_8$ · $A_7$  probe obtained (a) before and (b) after the addition of (A) berberine, (B) palmatine, and (C) sanguinarine. A mixture of 10 nM  $T_8$ -MB- $T_8$  and 100 nM  $A_7$  was incubated with 1  $\mu$ M triplex DNA binder in a solution containing 10 mM HEPES (pH 7.0) and 300 mM NaCl at room temperature for 10 min.



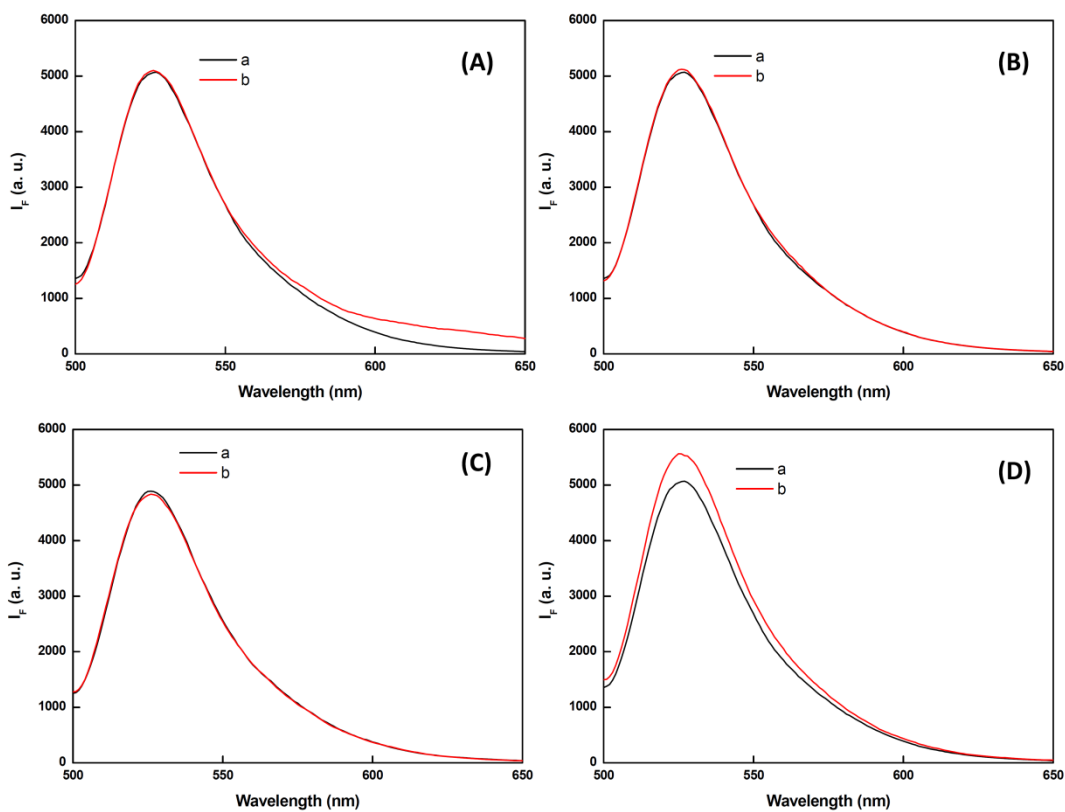

**Fig. S6.** Fluorescence spectra of solutions of the  $T_8\text{-MB-}T_8\cdot A_7$  probe obtained (a) before and (b) after the addition of (A) ethidium bromide, (B) DAPI, (C) AQ2A, and (d) 9-aminoacridine. A mixture of 10 nM  $T_8\text{-MB-}T_8$  and 100 nM  $A_7$  was incubated with 1  $\mu\text{M}$  duplex DNA binder in a solution containing 10 mM HEPES (pH 7.0) and 300 mM NaCl at room temperature for 10 min.

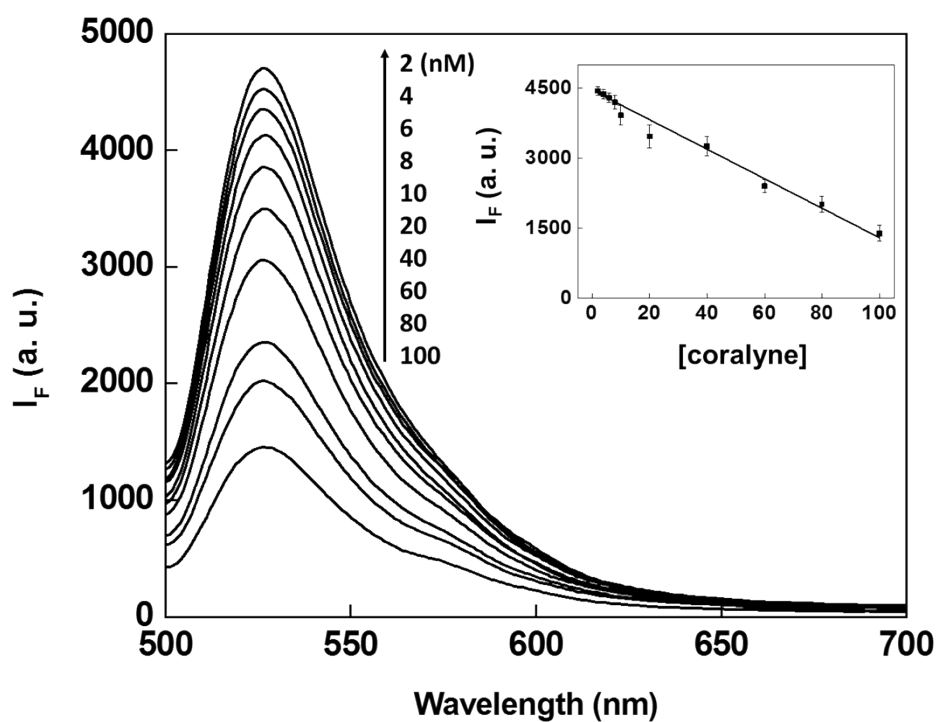

**Fig. S7.** Fluorescence spectra of the  $T_8$ -MB- $T_8$ · $A_7$  probe in the presence of increasing concentration of coralyne. Inset: a plot of the value of the fluorescence intensity at 520 nm *versus* the concentration of coralyne. A mixture of  $T_8$ -MB- $T_8$  and  $A_7$  was incubated with triplex DNA binder in a solution containing 10 mM HEPES (pH 7.0) and 300 mM NaCl at room temperature for 10 min. The error bars represent standard deviations based on three independent measurements.

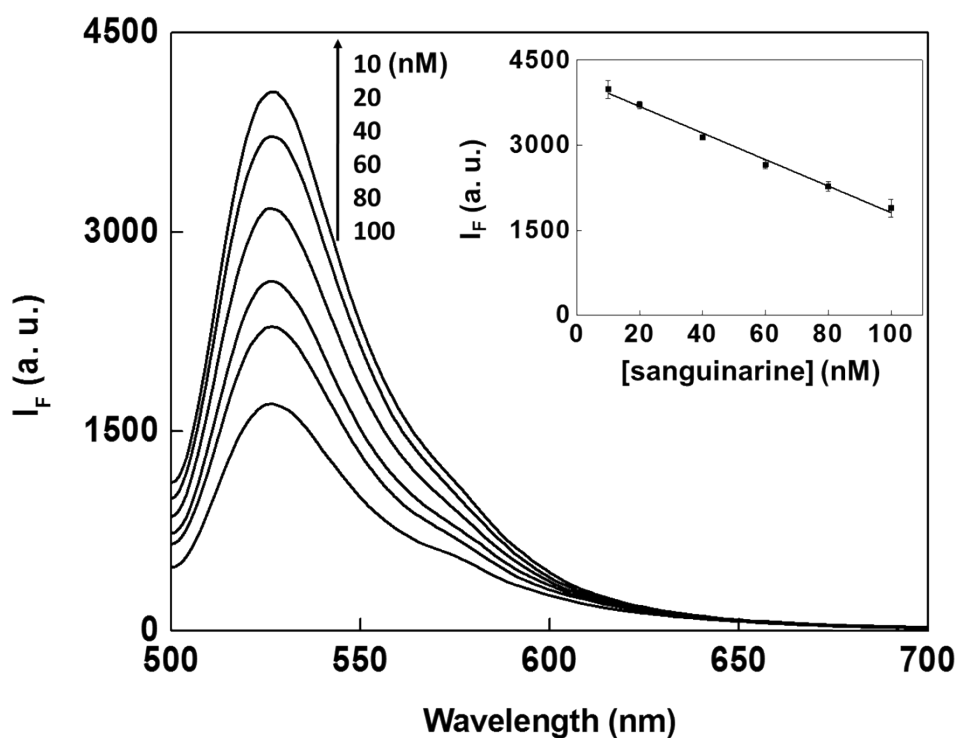

**Fig. S8.** Fluorescence spectra of the  $T_8$ -MB- $T_8$ - $A_7$  probe in the presence of increasing concentration of sanguinarine. Inset: a plot of the value of the fluorescence intensity at 520 nm *versus* the concentration of sanguinarine. A mixture of  $T_8$ -MB- $T_8$  and  $A_7$  was incubated with triplex DNA binder in a solution containing 10 mM HEPES (pH 7.0) and 300 mM NaCl at room temperature for 10 min. The error bars represent standard deviations based on three independent measurements.

**Table S1.** Comparison of other methods for the determination of coralyne.

| Material                                                        | detection                        | LOD          | linear range       | Reference                            |
|-----------------------------------------------------------------|----------------------------------|--------------|--------------------|--------------------------------------|
| G-quadruplex DNAzyme                                            | absorption                       | 19 nM        | 0.06 to 10 $\mu$ M | Anal. Method 2013, 5, 4671-4674      |
| graphene oxide-based aptamer sensor                             | fluorescence                     | Not given    | 10 to 700 nM       | Talanta 2013, 112, 117-122           |
| poly(dA)-based DNA sensor                                       | fluorescence                     | 65 nM        | 0.1 to 10 $\mu$ M  | Chem. Commun., 2011, 47, 11134-11136 |
| poly(dA)-adsorbed gold nanoparticle                             | absorption                       | Not given    | 0 to 728 nM        | Analyst, 2009, 134, 1647–1651        |
| coralyne-induced formation of peroxidasemimicking split DNAzyme | Absorption                       | 31 nM        | 50 to 5000 nM      | Analyst, 2013, 138, 4728-4731        |
| molecular beacon                                                | fluorescence                     | 2 nM         | 6 to 1000 nM       | Analyst 2014 139 1436-1441           |
| DNA-functionalized graphene                                     | absorption                       | 0.1 $\mu$ M  | 0.1 to 1 $\mu$ M   | Biomaterial 2013 34 4810-4817        |
| Polyadenosine                                                   | dual polarization interferometry | 0.22 $\mu$ M | 0.5 to 12 $\mu$ M  | Anal. Chem. 2012 84 924-930          |
| DNA-modified silica-Au/core-shell nanoparticles                 | SERS                             | 0.1 $\mu$ M  | 0.1 to 100 $\mu$ M | Anal. Methods 2013 5 3927-3932       |
| Molecular beacon and polyadenosine                              | fluorescence                     | 0.6 nM       | 2 to 100 nM        | This study                           |

**Table S2.** Comparison of other methods for the determination of sanguinarine

| Methods                                | detection            | LOD                | linear range                     | Reference                            |
|----------------------------------------|----------------------|--------------------|----------------------------------|--------------------------------------|
| high performance liquid chromatography | fluorescence         | 0.5 ng/mL          | 10 to 2000 ng/mL                 | J. Chromatogr. B 2004, 799, 195-200  |
| capillary electrophoresis              | fluorescence         | 5 µg/mL            | 50000 to 250000 ng/mL            | Talanta 2006, 70, 202-207            |
| high performance liquid chromatography | fluorescence         | 3 nM               | 10 to 10000 nM                   | J. Sep. Sci. 2003, 26, 679-685       |
| high performance liquid chromatography | ESI-MS               | 1.60 ng/mL         | 5.25 to 1050 ng/mL               | Chromatographia 2004, 60, 347-351    |
| capillary electrophoresis              | absorption           | 3 µM               | 20 to 500 µM                     | J. Chromatogr. A 2004, 1040, 141-145 |
| capillary electrophoresis              | absorption           | 3 µM               | 20 to 500 µM                     | J. Chromatogr. A 2000, 866, 293-298  |
| glutathione-capped CdTe/CdS dots       | quantum fluorescence | 3.4 ng/mL          | 0.2 to 40 µg/mL                  | Luminescence 2014, 29, 176-182       |
| molecular beacon and polyadenosine     | fluorescence         | 3 nM<br>(~1 ng/mL) | 10 to 100 nM<br>(~3 to 30 ng/mL) | This study                           |

**Table S3.** Sequence of molecular beacons and polyadenosine

| Name                                          | Sequence (5' to 3')                                           |
|-----------------------------------------------|---------------------------------------------------------------|
| T <sub>8</sub> -MB-T <sub>8</sub>             | FAM-T <sub>8</sub> CCA GAT ACT CAC CGG T <sub>8</sub> -DABCYL |
| T <sub>8</sub> -MB-T <sub>8</sub><br>(no dye) | T <sub>8</sub> CCA GAT ACT CAC CGG T <sub>8</sub>             |
| Poly A <sub>6</sub>                           | AAA AAA                                                       |
| Poly A <sub>7</sub>                           | AAA AAA A                                                     |
| Poly A <sub>8</sub>                           | AAA AAA AA                                                    |
| Poly A <sub>9</sub>                           | AAA AAA AAA                                                   |
| Poly A <sub>10</sub>                          | AAA AAA AAA A                                                 |
| Poly A <sub>11</sub>                          | AAA AAA AAA AA                                                |
